# Supplementary material
Source: HighWire-hosted journal article supplement (https://www.annfammed.org/highwire/filestream/8683/field_highwire_adjunct_files/0/Ventres_Supp_App.pdf)
Supplement: Ventres_Supp_App.pdf [file Ventres_Supp_App.pdf]

**Supplemental materials (Spanish translation of article) for:**

Ventres W. Healing. *Ann Fam Med*. 2016;14:76-78.

## **La curación con compasión**

William B. Ventres, MD, MA

**Afiliación del Autor:** Departamento de la Medicina Familiar, Universidad de Oregon de Salud y Ciencias, Portland, USA, y el Instituto de Estudios Históricos, Antropológicos y Arqueológicos, Universidad de El Salvador, San Salvador.

**Autor Correspondiente:** William Ventres, MD, MA Urbanización Buenos Aires III, Block H, Calle Los Maquilishuat, N° 3-A, San Salvador, El Salvador. Teléfono: +503-7193-9830. Email: wventres@gmail.com.

**Conflictos de Interés:** Ningún.

## **Resumen**

En este ensayo presento mi etos personal de curación. Es una expresión de mi creencia que puedo curar a pacientes a la vez que estoy cumpliendo con los objetivos tradicionales de la medicina. Reviso siete principios que fundamentan esta etos. Invito a otros, incluyendo a los estudiantes de medicina, residentes y médicos en la práctica de su profesión, a reflexionar y descubrir su propia etos de la curación y los principios que guían su crecimiento profesional. Un documental digital corto en inglés complementa este ensayo, para que los médicos puedan usarlo para estimular la reflexión sobre el desarrollo personal y profesional.

**Palabras Claves:** Educación médica, Bioética, Filosofía de la medicina, Relaciones médico-paciente, Competencia profesional

Para algunos, el don de la curación es algo natural. Para otros es algo que nunca logran hacerlo muy bien.

Para mí, el trabajo de convertirme en un curador ha sido una práctica deliberada desde que empecé mis estudios en la medicina hace más de tres décadas. Ha significado la adquisición de una gran cantidad de conocimientos biológicos e integrarles con habilidades de realizar exámenes clínicos y de resolver problemas médicos. Ha significado la combinación del conocimiento y habilidades con la sabiduría, mientras trato de ayudar a los pacientes a navegar en el sistema de atención de salud, así como a transformar las complejidades inherentes a la atención médica directa y hacerla más comprensible.

Además, esto ha significado el estudio reflexivo de los procesos interpersonales y culturales que influyen en la forma en que los médicos interactuamos con los pacientes. También ha implicado la observación del trabajo de otros médicos, tanto a quienes son modelos a seguir y quienes no lo son. Ha significado ser testigo de actos terapéuticos que me fueron realizados cuando yo estaba enfermo.<sup>1</sup> También ha incluido la reflexión de mis propias actitudes hacia los pacientes así como mis comportamientos con ellos. Convertirme en un curador (además de un médico) ha significado el aprendizaje continuo en el trabajo, de diversas formas de examen y mejorar las formas en que trato con mis pacientes, compañeros de trabajo y colegas.

No me ha sido fácil ocuparme de estas dimensiones interrelaciones de curación.

Sospecho que también ha sido difícil para otros profesionales de la medicina, incluyendo estudiantes, residentes y médicos. Muchos artículos en revistas médicas, libros

académicos y literarios, así como películas contemporáneas me han ayudado a considerar lo que implica la práctica de curación (ver Tabla 1). Sin embargo, el camino hacia la integración de los conceptos propuestos por dichos medios dentro mi propia identidad profesional ha sido especialmente difícil por las presiones del trabajo cotidiano en un ambiente de atención médica complicada y cambiante. Empero, en algún lugar a lo largo del camino, he desarrollado mi propio etos de curación: como expresión de mi fe, puedo curar a mis pacientes y a la vez que cumplo con los objetivos tradicionales de la medicina.<sup>2</sup> En el presente ensayo y en el adjunto documental digital (disponible en <http://www.annfammed.org/content/14/1/xxx/suppl/DC1>), presento este etos de la curación y reviso los siete principios fundamentales que la fundamentan. Espero con ello que otros profesionales, incluidos aquellos que, como yo, no son curadores naturales, así como quienes parecen tener naturalmente el don de la curación, consideren desarrollar su propio etos y sus principios. Así, busco que cuando estos profesionales lleguen a la etapa en el ciclo de vida profesional en la cual me encuentro, puedan reflexionar sobre su desempeño con orgullo honesto, basado en un trabajo honorable y bien hecho.

### **Mi Etos de la Curación**

Como curador me comprometo con mis pacientes, según mis capacidades, para ayudarles a enfrentar la enfermedad con menos miedo y más dignidad, a equilibrar la realidad con la esperanza, con el fin de que ellos se adapten a su padecimiento de una manera significativa y les ayude a sentirse mejor, en lugar de peor.

### **Principios que apoyan el etos de curación.**

Siete principios claves sostienen este etos de curación.

La *dignidad* es el reconocimiento de que cada paciente es una persona con valor inherente, que merece respeto, tiempo y atención. Cada paciente es una persona completa, no solamente una colección de órganos o vías fisiológicas, sino una entidad integral que es a la vez el cuerpo, mente y—¡sí!—alma. Cada paciente es una persona con una historia y un futuro, con éxitos y fracasos; una persona con esperanzas y temores, alegrías y frustraciones; una persona que, habiendo entrado en este mundo, se enfrentará tarde o temprano a los desafíos del padecimiento y la enfermedad e, inexorablemente, saldrá de él.

La *autenticidad* es la acción de llevar la esencia de mi humanidad a los encuentros clínicos con pacientes. Lo que yo aporte a estas interacciones en gran parte determina si estas funcionan como crisoles de cambios curativos o no. ¿Estoy sinceramente interesado en mis pacientes? ¿Estoy consciente, presente y seguro de mí mismo, sin ser arrogante? ¿Soy creativo al responder a las necesidades de mis pacientes? Ser auténtico significa reconocer que mi desempeño es mejor cuando soy curioso, empático y estoy apasionado por el trabajo que realizo; reconociendo que el combinar la construcción de la relación médico-paciente con el manejo de los asuntos estrictamente biomédicos tiene un enorme valor terapéutico.

La *integridad* es la habilidad de vincular la dignidad y la autenticidad; es la capacidad de ver la realidad con honestidad, informada por un conocimiento holístico usando una consciencia biopsicosocio-existencial.<sup>3</sup> A nivel personal, significa mantenerse al día con los muchos avances diagnósticos y terapéuticos nacidos de la ciencia médica contemporánea, balanceando la aplicación de este conocimiento científico con el entendimiento de que el sufrimiento acompaña a todas las experiencias de la enfermedad.

Relacionalmente, significa establecer con los pacientes una “presencia compartida” de la cual se deriven tratamientos eficaces y mejoren los resultados clínicos.<sup>4</sup> En su esencia, la integridad en cualquier situación significa dar lo mejor de sí mismo, con los recursos que se tengan, dondequiera que esté, cual sea la situación presente..

La *transparencia* implica abordar con apertura los encuentros curativos. Significa escuchar con atención, usando un estilo de preguntar-y-reflexionar, reconociendo las diferencias de opinión; todo con la esperanza de llegar a decisiones más acertadas. No se trata solamente de transferir la información; no es simplemente recitar riesgos y beneficios a fin de obtener el consentimiento informado de un paciente. No es solo educar a los pacientes por al pensar en voz alta. Sin duda no es deponer mi responsabilidad profesional de guiar la atención clínica cuando es requerido. La transparencia es una propuesta democrática que reduce las asimetrías de poder entre mis pacientes y yo, una que fomenta un colaboración de dar-y-recibir para aclarar inquietudes, explorar opciones y enfocarse en las soluciones.

La *solidaridad* es el entendimiento de que estoy trabajando *con*, y no solo *para* mis pacientes. Mis pacientes y yo, a pesar de las diferencias en nuestras educaciones, condiciones sociales o situación económica, vivimos en un mundo interdependiente. Todos se benefician cuando la atención que deseamos para nosotros mismos también podemos desearla para otros. A través de mi elección de trabajo—dónde, cómo y con quién practico—expreso mi creencia en la solidaridad. A través de una actitud sin prejuicios, una confianza cómoda y una buena dosis de humildad sincera transformo esa creencia en curación.

La *generosidad* es la disposición de entregar mi tiempo, recursos y a mí mismo. A diferencia de altruismo (el cual implica una presencia heroica motivada por el sacrificio), la generosidad sugiere intercambio: ofrezco a otros atención médica competente; a cambio recibo su confianza y respeto. Así, la generosidad implica un sentimiento recíproco de gratitud por la oportunidad de ayudar y ser ayudado, gratitud compartida no sólo con mis pacientes, sino también con los otros profesionales de la salud que participan de su cuidado.

La *resiliencia*—el poder de recuperación—es la capacidad de caer y volver a levantarse, errar el juicio el conocimiento y seguir adelante; saber cuándo he hecho menos de lo posible; valorar honestamente una situación y sus circunstancias; moverme hacia el perdón, reavivar las llamas de la sabiduría y crecer. La resiliencia es un proceso tanto humilde como enriquecedor, que me anima aprender de mis errores y de mis logros.

### **Otras Consideraciones y Conclusiones**

Algunos médicos y educadores de medicina argumentarán que he perdido totalmente el punto de la práctica clínica. La medicina es una profesión de diagnósticos y tratamientos: cuanto mejor afinamos estas tareas, mejor atendemos a las necesidades de nuestros pacientes. Sin negar la importancia de llevar a cabo estas tareas, estoy completamente en desacuerdo. Creo que la curación y la compasión pueden y deben coexistir. También creo que los enfoques en la práctica son parte valiosa de cualquier proceso clínico que pretende ser terapéutico. Dado que aquí he discutido un *etos* y sus principios, este no debería implicar que no utilizo técnicas basadas en la evidencia, orientados hacia objetivos específicos durante mis interacciones con los pacientes,

técnicas que están a la vez centradas en la relación médico-paciente, eficientes en el uso del tiempo y médicamente eficaces.<sup>4,5</sup>

Otros médicos y educadores argumentarán que valorar la curación en una época obsesionada con la maximización de la producción y las ganancias es una tontería. Estoy también en desacuerdo vigorosamente con esta idea. Encontrar maneras creativas de llevar mi etos de curación a la vanguardia de mi trabajo—sosteniéndole como luces en la oscuridad para guiar las relaciones con mis pacientes—no solo me ayuda a ayudar a los demás mientras construyen su vida, sino también me ayuda a prosperar personal y profesionalmente en un ambiente desafiante para la educación y la práctica.

He definido mi etos de curación y los siete principios que le sustentan basado en mi propia práctica de la medicina. Mi intención no es convertirlos —a los estudiantes de medicina, a los residentes o a los otros médicos—a mis creencias. Más bien, es invitarlos a reflexionar y descubrir su propio etos de la curación y los principios que guían su desarrollo profesional. Estas exploraciones apreciativas de autorreflexión no rectificarán todos los problemas que existen en la atención de la salud hoy en día;<sup>6</sup> tampoco no eliminarán los muchos factores que funcionan como detonantes de insatisfacción profesional hoy en día.<sup>7</sup> Sin embargo, pueden ayudarnos a dirigir nuestros propios destinos como participantes activos de la curación con compasión. Pueden ayudarnos a aliviar, en alguna pequeña medida, el sufrimiento que tienen nuestros pacientes. Pueden ayudarnos a evitar que terminemos lamentándonos al no haber actuado bien, pero creyendo que hemos hecho, y seguir haciendo, una diferencia de curación cada día.

**Agradecimientos:** Les doy gracias a Alison Deming, MFA, Richard Frankel, PhD, y Paul Gordon, MD, MPH, por sus comentarios reflexivos sobre este manuscrito, y a Esthela Ventres y Virginia Lemus por su ayuda en traducirlo en español. También les doy gracias a Keven Siegert, Brian Hischer, y Matthew Alexander, PhD, por sus contribuciones a la documental digital de acompañamiento.

## REFERENCIAS

1. Ventres W. Stepping back from the edge. *Pulse: Voices from the Heart of Medicine*. <http://www.pulsevoices.org/index.php/archive/stories/231-stepping-back-from-the-edge>. Consultado el 29 de mayo de 2015.
2. Hastings Center. The goals of medicine. Setting new priorities. *Hastings Cent Rep*. 1996;26(suppl.):S1–S27.
3. Engel GL. The clinical application of the biopsychosocial model. *Am J Psychiatry*. 1980;137(5):535–544.
4. Ventres WB, Frankel RM. Shared presence in doctor-patient communication: A graphic representation. *Fam Syst Health*. Impreso.
5. Mauksch LB, Dugdale DC, Dodson S, Epstein R. Relationship, communication, and efficiency in the medical encounter: creating a clinical model from a literature review. *Arch Intern Med*. 2008;168(13):1387-95.
6. Ventres WB, Haq CL. Toward a cultural consciousness of self in relationship: From “us and them” to “we”. *Fam Med*. 2014;46(9):691-695.
7. Mechanic D. Physician discontent: Challenges and opportunities. *JAMA*. 2003;290(7):941-946.

**Tabla 1: Recursos sobre la curación y el desarrollo profesional—Algunas preferencias personales**

Artículos de revistas médicas\*

Brody H. The family physician: what sort of person? *Fam Med*. 1998;30(8):589-93.

Egnew TR. The meaning of healing: transcending suffering. *Ann Fam Med*. 2005;3(3):255-62.

Loxtercamp D. A vow of connectedness: views from the road to Beaver's farm. *Fam Med*. 2001;33(4):244-7.

Miller W. Routine ceremony or drama: An exploratory field study of the primary care clinical encounter. *J Fam Pract*. 1992;34(3):289-96.

Scott JG, Cohen D, Dickey-Bloom B, Miller WL, Stange KC, Crabtree BF. Understanding healing relationships in primary care. *Ann Fam Med*. 2008 6(4):315-22.

Libros académicos y literarios

Cassell EJ. *The Nature of Suffering and the Goals of Medicine*, 2nd ed. New York, NY: Oxford University Press; 2004.

Kleinman A. *The Illness Narratives: Suffering, Healing, and the Human Condition*. New York, NY: Basic Books; 1988.

Nepo M. *Surviving Has Made Me Crazy*. Fort Lee, NJ: CavanKerry Press, 2007

Remen RN. *Kitchen Table Wisdom: Stories that Heal*. New York, NY: Riverhead Books; 1996.

Williams WC. *The Doctor Stories*. New York, NY: New Directions Publishing Corporation; 1984.

Películas contemporáneas

Demme J. *Philadelphia*. Culver City, CA: TriStar Pictures; 1993.

Haines R. *The Doctor*. Burbank, CA: Touchstone Pictures; 1991.

Lynch D. *The Elephant Man*. Hollywood, CA: Paramount Pictures; 1980.

Nichols M. *Wit*. Los Angeles, CA: HBO Films/Avenue Pictures Productions; 2001.

Salles W. *Diarios de Motocicleta [The Motorcycle Diaries]*. Buenos Aires, Argentina: Argentina-USA-Chile-Perú; Filmfour/South Fork Pictures/Tu Vas Voir Production; 2004.

\* Estos artículos reflejan mi desarrollo como médico de familia. Los residentes y médicos de otras especialidades bien pueden encontrar guías para desarrollar de su propio ethos de la curación con compasión de los autores de sus respectivas disciplinas.
